# Supplementary material for: Oncogenic ZEB2/miR-637/HMGA1 signaling axis targeting vimentin promotes the malignant phenotype of glioma
Source: PubMed Central journal article supplement — Mol Ther Nucleic Acids. 2021 Jan 5;23:769–82. doi: 10.1016/j.omtn.2020.12.029 (PMC7868719; doi:10.1016/j.omtn.2020.12.029), 2021-01-05
Supplement: mmc1.pdf [file mmc1.pdf]

OMTN, Volume 23

## Supplemental Information

**Oncogenic ZEB2/miR-637/HMGA1 signaling  
axis targeting vimentin promotes  
the malignant phenotype of glioma**

**Yu Zeng, Tianshi Que, Jie Lin, Zhengming Zhan, Anqi Xu, Zhiyong Wu, Cheng Xie, Jie Luo, Shengfeng Ding, Hao Long, Xian Zhang, and Ye Song**



**Table S1. Primers used for qPCR or PCR**

| <b>Gene Name</b>       | <b>Sequences</b> |                                                                          |
|------------------------|------------------|--------------------------------------------------------------------------|
| miR-637                | sense            | 5'- ACTGGGGGCTTTCGGGCTCTGCGT -3',                                        |
|                        | anti-sense       | general primer using miRNA PrimeScript RT Enzyme Mix kit (Takara, Japan) |
| HMGA1                  | sense            | 5'- ATGAACTCCGAAGGCCAGCC -3'                                             |
|                        | anti-sense       | 5'- CCTTCCTAGGTCTGCCTCTTGG -3'.                                          |
| ACTB                   | sense            | 5'-CATGTACGTTGCTATCCAGGC-3'                                              |
|                        | anti-sense       | 5'-CTCCTTAATGTCACGCACGAT-3'                                              |
| ChIP Primer for Site 1 | sense            | 5'-CCTCTCGAAGTGCAAGGAAG-3'                                               |
|                        | anti-sense       | 5'-AGGCTGCAGTGAGCTAGGAC-3'                                               |
| ChIP Primer for Site 2 | sense            | 5'-TGCTCTTGTTGTCCAGGTTG-3'                                               |
|                        | anti-sense       | 5'-GGTGAAACCCCGTCTCTTCT-3'                                               |

**Table S2. Sequences of siRNA**

| <b>Construct</b> | <b>Sequence</b>            |
|------------------|----------------------------|
| siZEB2           | 5'- GGACACAGGUUCUGAAACA-3' |
| siHMGA1          | 5'-CCAUGAACGAGUUUGAGUA-3'  |
| siVimentin       | 5'-GCAGGAUGAGAUUCAGAAU-3'  |
